# Supplementary material
Source: PubMed Central journal article supplement (PMC5892415)
Supplement: NIHMS796208-supplement-1.pdf [file NIHMS796208-supplement-1.pdf]

# Supplementary Figure 1

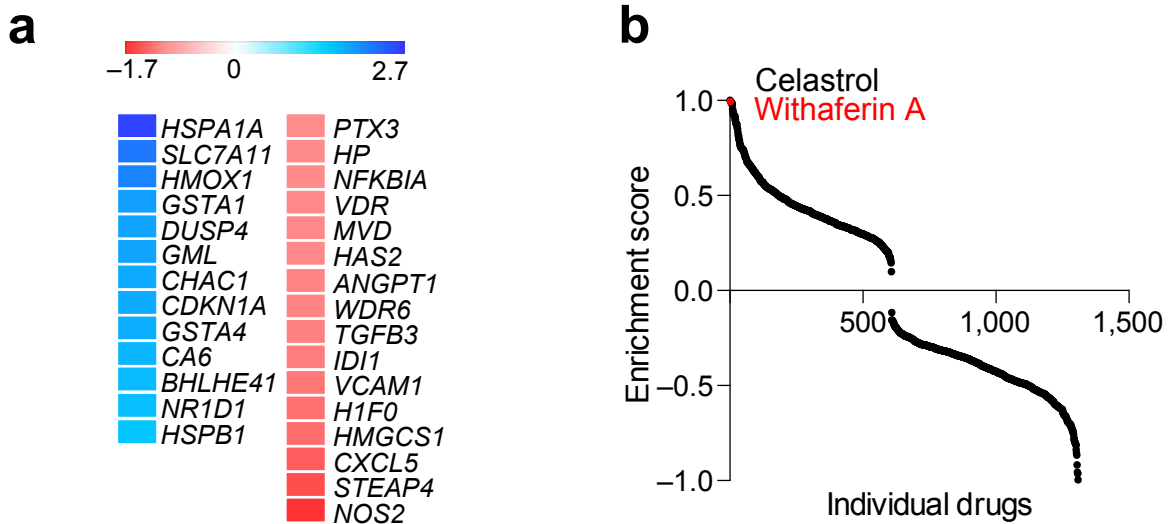

**Supplementary Figure 1.** Identification of withaferin A as an anti-obesity compound. **(a)** Heatmap of corresponding human homologs of the gene expression signature in **Fig. 1b**, which was used as CMAP query. **(b)** Distribution of enrichment scores of the individual compounds from the CMAP result using celastrol's gene expression signature from **a**.

## Supplementary Figure 2

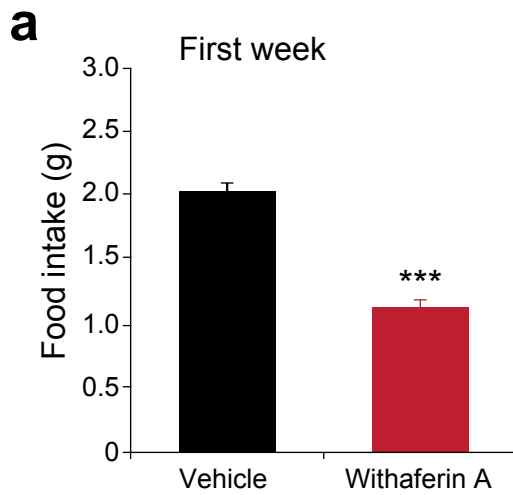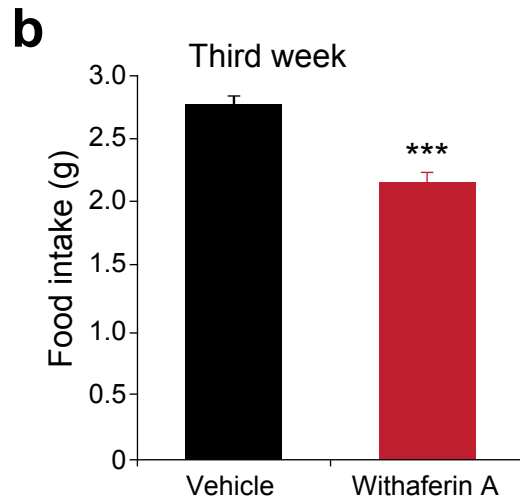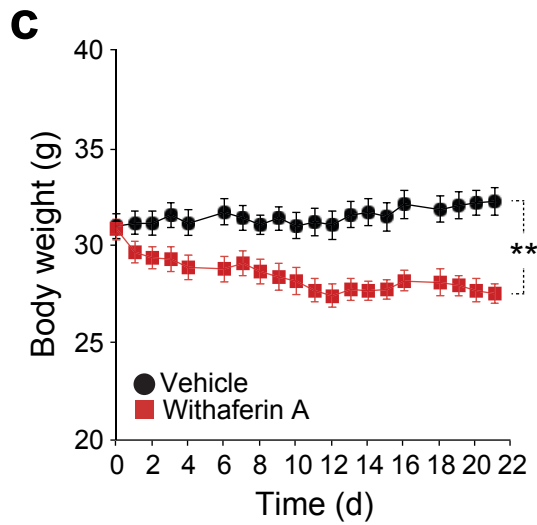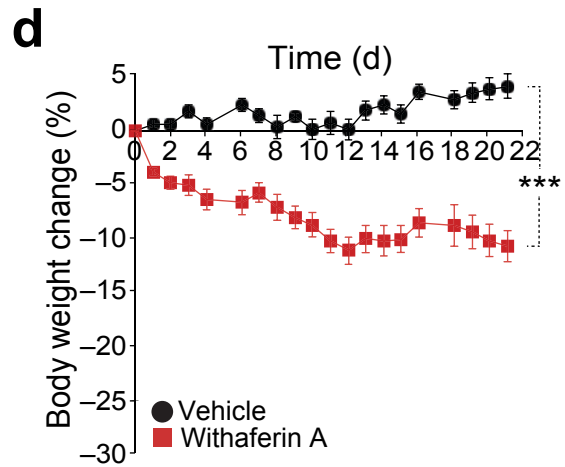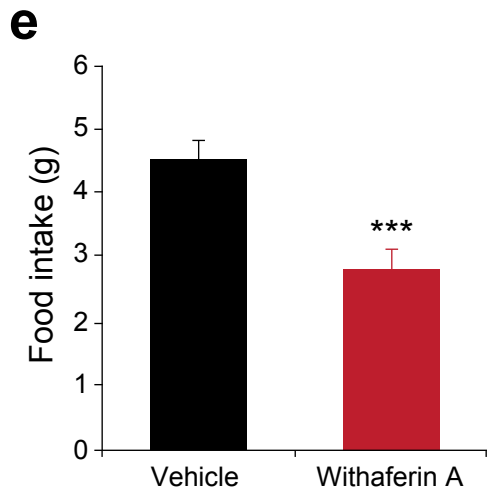

**Supplementary Figure 2.** Withaferin A reduces body weight and food intake of diet-induced obese (DIO) and heavier mice on chow diet. **(a,b)** DIO mice received DMSO or withaferin A (1.25 mg/kg) daily. Daily food intake from the average of 1 week food intake during **(a)** the first week and **(b)** the third week of treatment. Bar graphs represent the average of four independent experiments. **(c–e)** Heavier mice on chow diet (with 31 g of average body weight) received DMSO or withaferin A (2 mg/kg) daily. **(c)** Body weight and **(d)** percent change of body weight during 3-week treatment ( $n = 10$ , vehicle;  $n = 9$ , withaferin A). **(e)** Daily food intake from the average of 3-d food intake during the first week of treatment. Values are averages  $\pm$  s.e.m. Statistical significance was determined by two-way ANOVA **(c,d)** or Student's *t* test **(a,b,e)** \*\*\*  $P < 0.001$ .

# Supplementary Figure 3

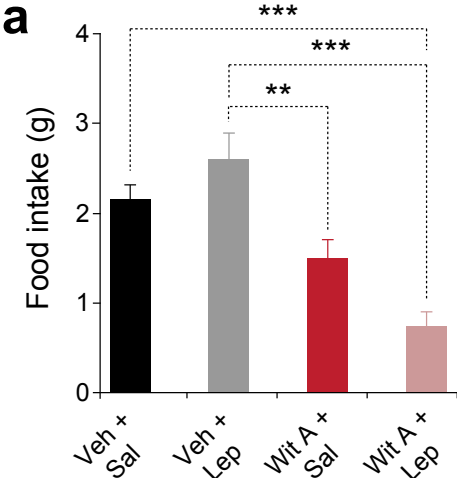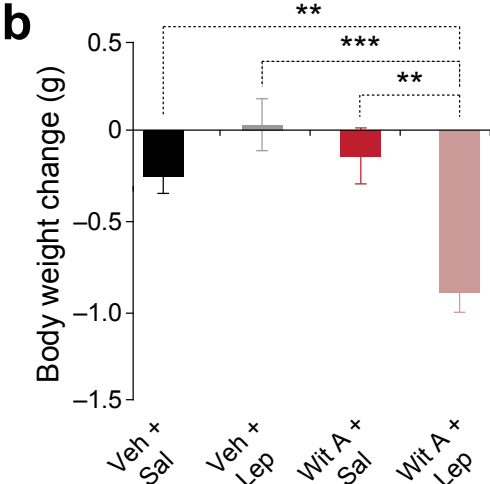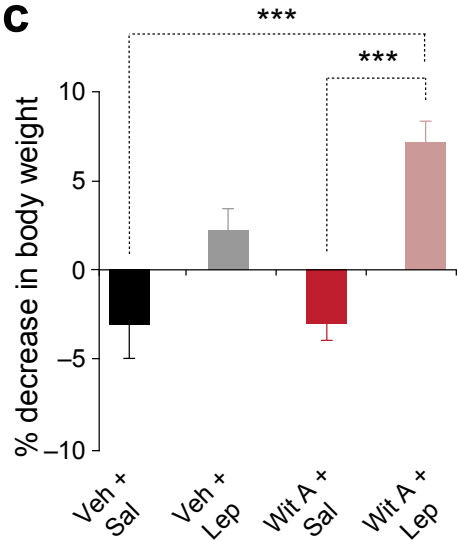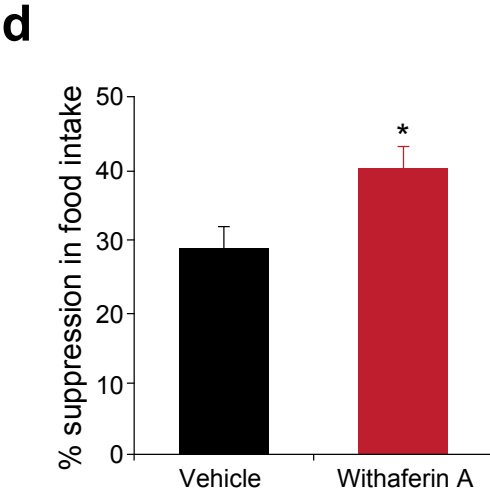

**Supplementary Figure 3.** Withaferin A potentiates the anorexigenic and weight reducing effect of leptin. **(a,b)** DIO mice were treated with vehicle or withaferin A (1.5 mg/kg) for 2 d. After the second treatment, groups were divided into two subgroups and each subgroup received saline or leptin (1 mg/kg). **(a)** Food intake and **(b)** body weight change during 15-h period after saline/leptin injection. Data in **a,b** are average of two independent cohorts ( $n = 10$  for Veh + Sal;  $n = 11$  for Veh + Lep, Wit A + Sal and Wit A + Lep). **(c–d)** 8-week-old male *ob/ob* mice received vehicle or withaferin A (1 mg/kg) for 5 d. Subsequently, vehicle or withaferin A pre-treated mice were further divided into two subgroups to receive either saline or leptin (0.1 mg/kg) together with vehicle or withaferin A for additional 2 weeks ( $n = 5$  per group). **(c)** Percent weight loss after 2 weeks of leptin treatment. **(d)** Percent of food intake suppression during the second week of leptin treatment. Values are averages  $\pm$  s.e.m.  $P$  values are determined by one-way ANOVA with Bonferroni *post hoc* test (**a–c**) or Student's *t* test (**d**). See Online Methods for the details of statistical analysis. \*  $P < 0.05$ , \*\*  $P < 0.01$ , \*\*\*  $P < 0.001$ .

## Supplementary Figure 4

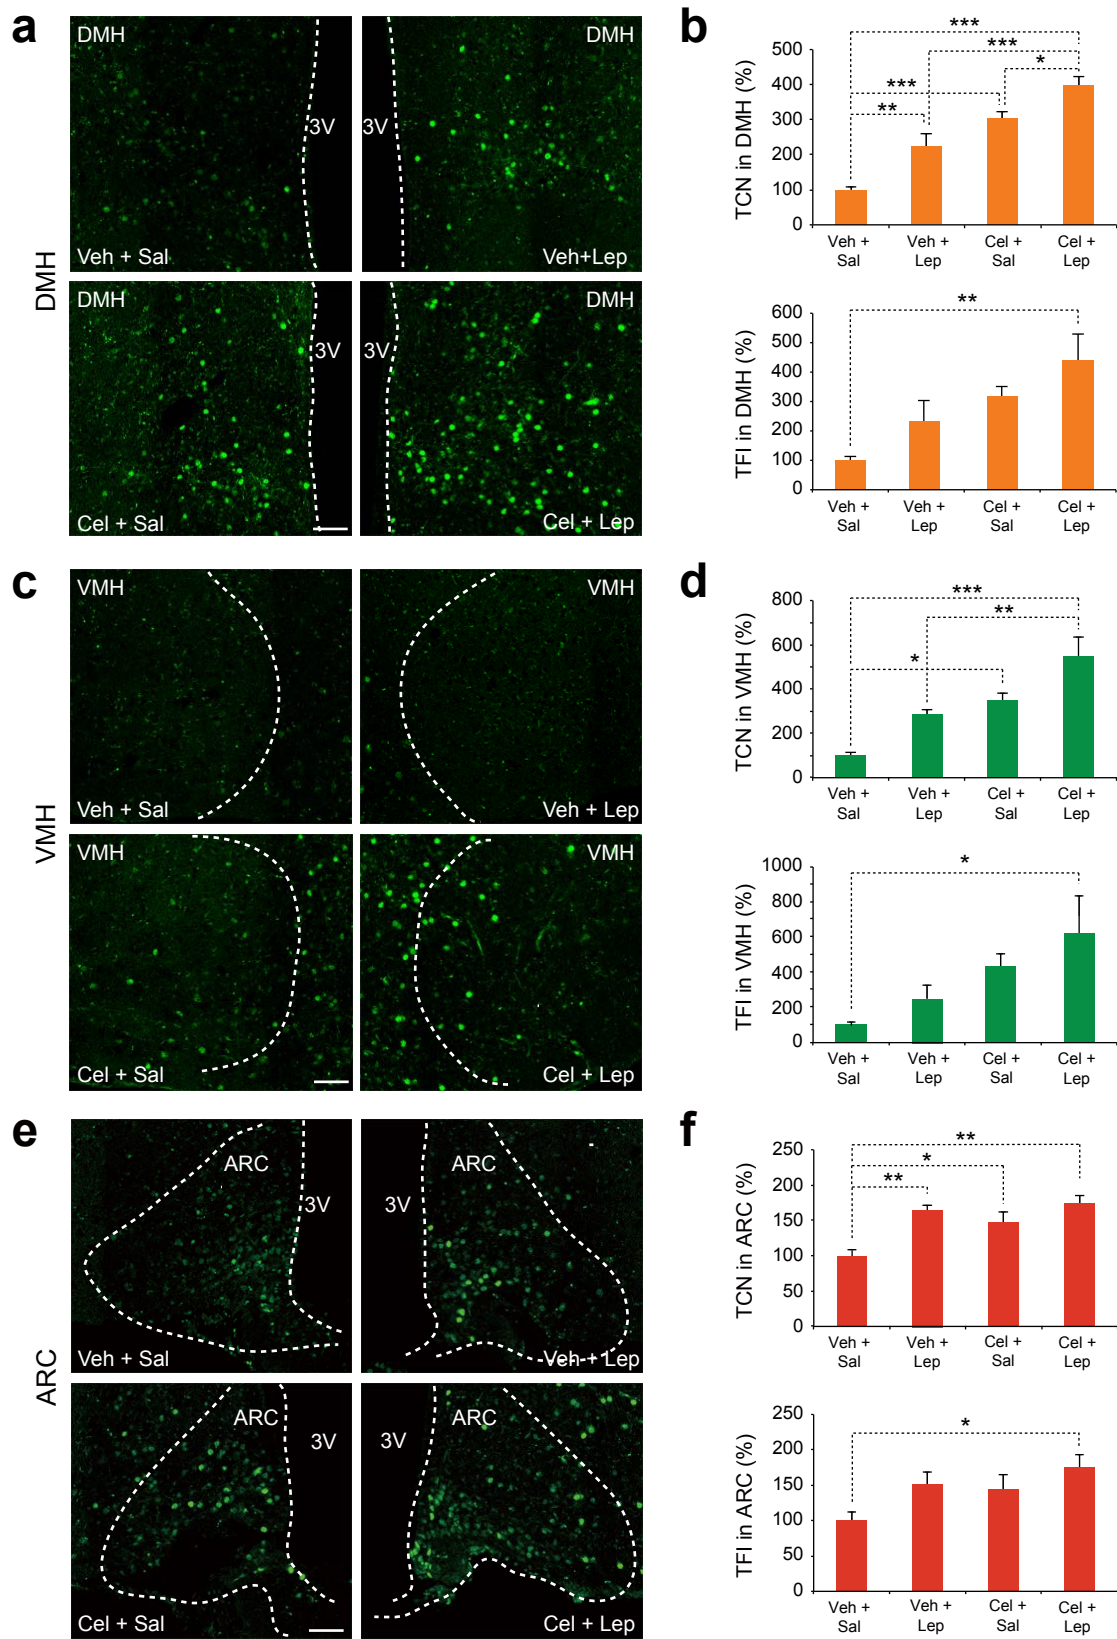

**Supplementary Figure 4.** Celastrol increases leptin sensitivity in the hypothalamus of DIO mice. (a–f) DIO mice were administered with vehicle or celastrol for 4 d (100 µg/kg for first 3 d and 200 µg/kg on day 4). Each group of mice subsequently received a single dose of saline or leptin (1 mg/kg). The hypothalamic samples were analyzed by immunohistofluorescence staining using p-STAT3<sup>Tyr705</sup> specific antibodies. The representative image of p-STAT3<sup>Tyr705</sup> positive cells in the (a) dorsomedial hypothalamus (DMH), (c) ventromedial hypothalamus (VMH) and (e) arcuate nucleus (ARC) (total numbers of analyzed images are provided in Online Methods). The quantified results of total p-STAT3<sup>Tyr705</sup> positive cell numbers (TCN, top panel) and fluorescence intensities (TFI, bottom panel) in (b) DMH, (d) VMH and (f) ARC. Bar graphs represent average of two independent experiments (total  $n = 7$  mice per group). Values are averages  $\pm$  s.e.m.  $P$  values are determined by one-way ANOVA with Tukey *post hoc* test (b,d,f). See Online Methods for the details of statistical analysis. \*  $P < 0.05$ , \*\*  $P < 0.01$ , \*\*\*  $P < 0.001$ . Scale bars, 100 µm.

## Supplementary Figure 5

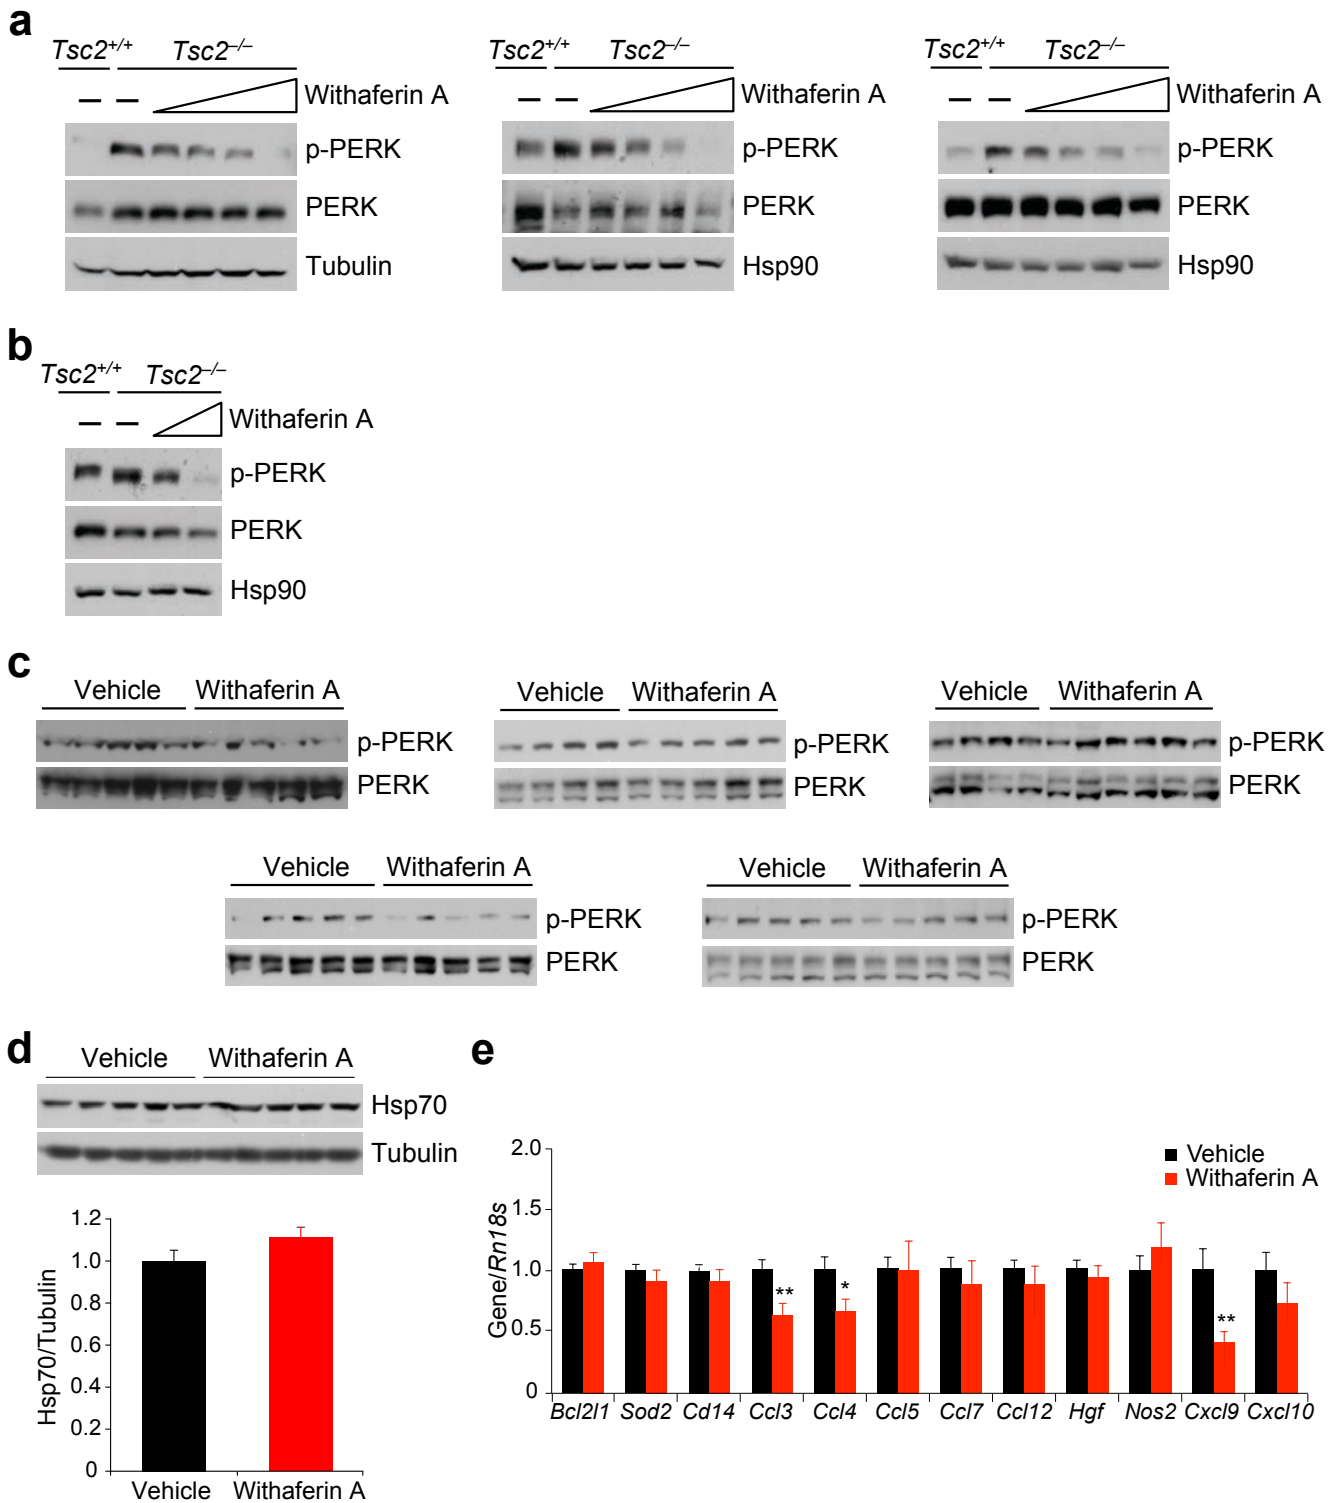



**Supplementary Figure 5.** Withaferin A administration decreases endoplasmic reticulum stress in MEFs and in the hypothalamus of DIO mice. **(a)** Phospho-PERK<sup>Thr980</sup> (p-PERK), total PERK, tubulin and Hsp90 immunoblotting from *TSC2*<sup>-/-</sup> MEFs treated with increasing doses of withaferin A (0.5, 1, 2 and 4  $\mu$ M) or vehicle for 16 h. As a control, *TSC2*<sup>+/+</sup> MEFs were treated with vehicle. **(b)** p-PERK, total PERK and Hsp90 immunoblotting from *TSC2*<sup>-/-</sup> MEFs treated with increasing doses of withaferin A (0.5 and 1  $\mu$ M) or vehicle for 24 h. **(c–e)** DIO mice received vehicle or withaferin A (2 mg/kg) for 3 d (see online method for the detailed procedure). **(c)** p-PERK and total PERK immunoblotting from the hypothalamic lysates. The quantified ratio between phospho- and total PERK from blots in **c** was analyzed together in two-way ANOVA and the result is depicted in **Fig. 5b**. **(d)** Hsp70 and tubulin protein levels in western blot (top) and the quantified ratio of signal intensities of Hsp70 to tubulin (bottom). The experiments in **d** were repeated in five independent cohorts (total  $n = 25$  for vehicle and  $n = 26$  for withaferin A). **(e)** NF- $\kappa$ B target gene expression analyzed by real-time PCR. Bar graphs represent the average of four independent experiments (total  $n = 21$  per group). Values are averages  $\pm$  s.e.m. Statistical significance was determined by Student's *t* test (**d,e**). \*  $P < 0.05$ , \*\*  $P < 0.01$ .

## Supplementary Figure 6

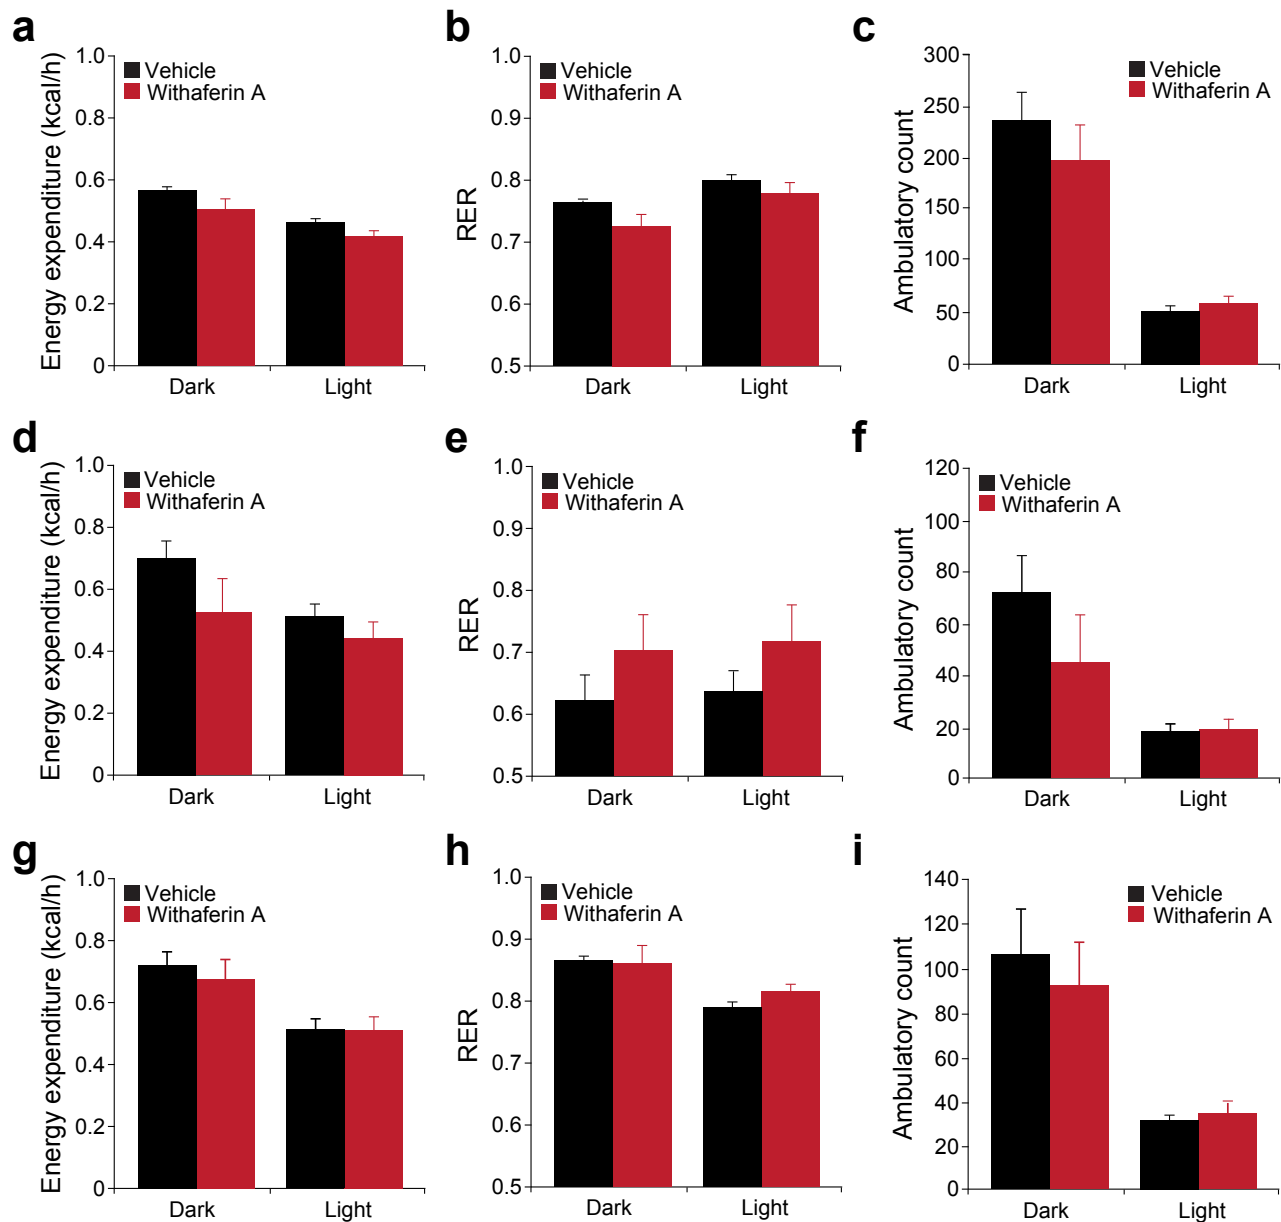

**Supplementary Figure 6.** There is no difference in metabolic parameters of mice after chronic withaferin A treatment. **(a–c)** DIO (total  $n = 15$  for vehicle and total  $n = 13$  for withaferin A from two independent cohorts), **(d–e)** *ob/ob* ( $n = 8$  for vehicle,  $n = 5$  for withaferin A) and **(g–i)** *db/db* mice ( $n = 4$  per group) received vehicle or withaferin A (2 mg/kg) for 18 d. Following 18-d treatment, mice were placed into metabolic chambers and treated continuously with either vehicle or withaferin A (2 mg/kg) for additional 3 d (see Online Methods for the detailed procedure). Energy expenditure (kcal/h) of **(a)** DIO, **(d)** *ob/ob* and **(g)** *db/db* mice. Respiratory exchange ratios (RER) ( $VCO_2/VO_2$ ) of **(b)** DIO, **(e)** *ob/ob* and **(h)** *db/db* mice. Ambulatory physical activity of **(c)** DIO, **(f)** *ob/ob* and **(i)** *db/db* mice. Bar graphs represent 24 h data (single dark and light cycles) collected after 24 h **(a–c)**, 72 h **(g–i)** or 12 h **(j–l)** in metabolic chambers. Results in **a–c** were the average of two independent cohorts. Values are averages  $\pm$  s.e.m.  $P$  values are determined by Student's  $t$  test.

## Supplementary Figure 7

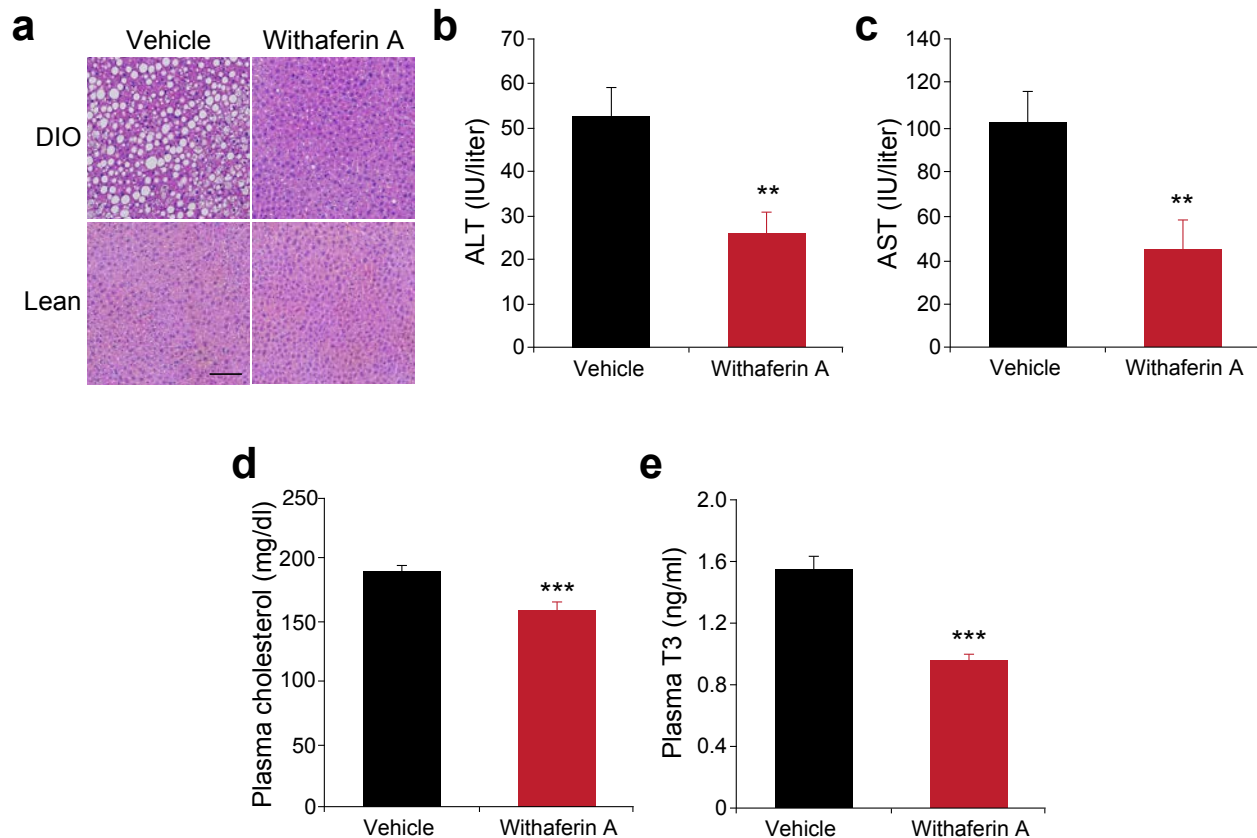

**Supplementary Figure 7.** Withaferin A reverses HFD-induced metabolic abnormalities. (a–e) DIO and lean mice received either vehicle or withaferin A (1.25 mg/kg for a–d, 2 mg/kg for e, 3 weeks). (a) Representative hematoxylin and eosin (H&E) staining of liver sections of DIO and lean mice at the end of the treatment (two images per mouse;  $n = 9$ , lean vehicle;  $n = 10$ , lean withaferin A;  $n = 9$ , DIO vehicle;  $n = 7$ , DIO withaferin A). (b) Plasma alanine transaminase (ALT) ( $n = 10$  per group), (c) aspartate transaminase (AST) ( $n = 10$  per group) (d) total plasma cholesterol ( $n = 38$  for vehicle,  $n = 35$  for withaferin A) and (e) triiodothyronine (T3) concentrations ( $n = 7$  per group) of DIO mice after 3 week of treatment. The results in a–c were repeated with three (a) or four (b,c) independent cohorts. The result in d is the average of four independent experiments. Values are averages  $\pm$  s.e.m.  $P$  values are determined by Student's  $t$  test (b–e). \*\*  $P < 0.01$ , \*\*\*  $P < 0.001$ . Scale bar, 100  $\mu$ m.

# Supplementary Figure 8

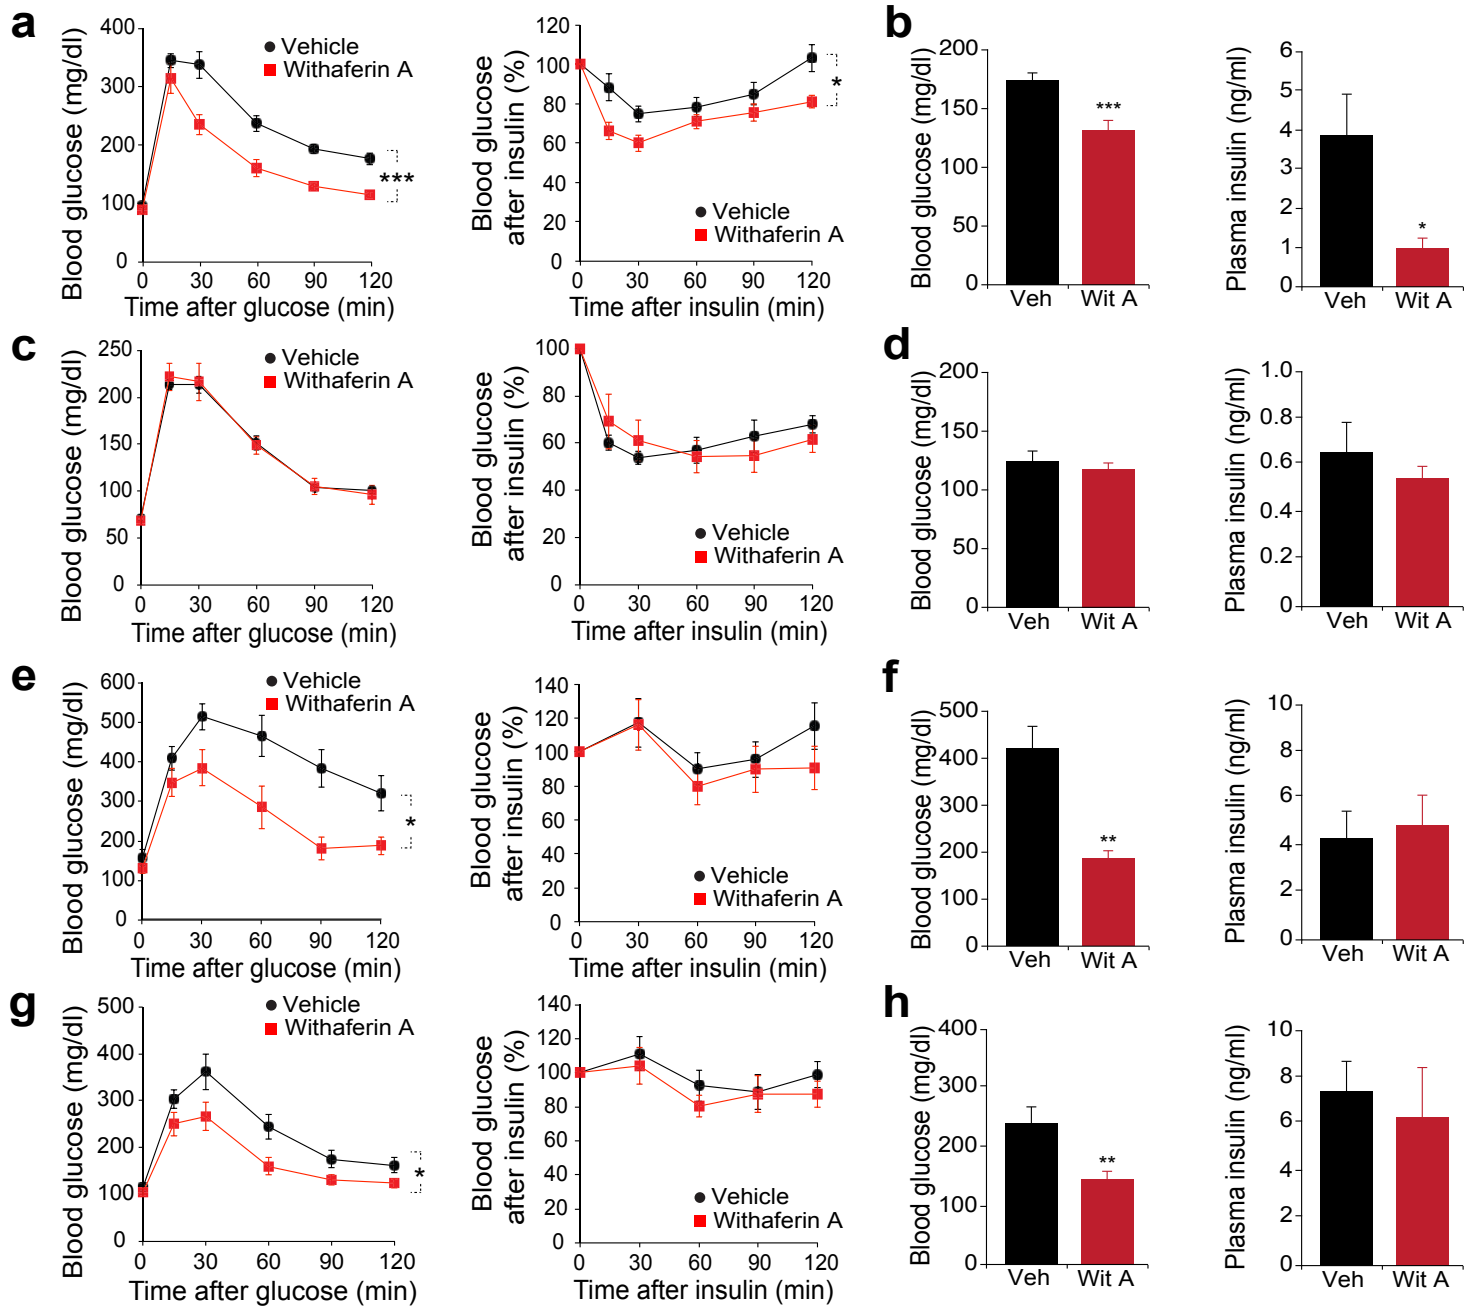

**Supplementary Figure 8.** Withaferin A improves glucose homeostasis of obese mice. (a–h) DIO, lean, *db/db* and *ob/ob* mice received vehicle or withaferin A (1.25 mg/kg) for 3 weeks. (a,c,e,g, left panels) Glucose tolerance test of (a) DIO ( $n = 9$  per group), (c) lean ( $n = 7$ , vehicle;  $n = 5$ , withaferin A), (e) *db/db* ( $n = 10$ , vehicle;  $n = 8$ , withaferin A) and (g) *ob/ob* ( $n = 9$  per group) mice after 1 week (a) or 2 weeks (c,e,g) of treatment. (a,c,e,g, right panels) Insulin tolerance test of (a) DIO ( $n = 10$  per group), (c) lean ( $n = 9$  per group), (e) *db/db* ( $n = 10$ , vehicle;  $n = 8$ , withaferin A) and (g) *ob/ob* ( $n = 10$ , vehicle;  $n = 7$ , withaferin A) mice after 3-week treatment. (b,d,f,h, left panels) 6-h fasting blood glucose concentrations of (b) DIO ( $n = 9$  per group), (d) lean ( $n = 9$ , vehicle;  $n = 10$ , withaferin A), (f) *db/db* ( $n = 9$ , vehicle;  $n = 7$ , withaferin A) and (h) *ob/ob* ( $n = 9$  per group) mice after 3-week treatment. (b,d,f,h, right panels) Plasma insulin concentrations of (b) DIO ( $n = 9$ , vehicle;  $n = 6$ , withaferin A), (d) lean ( $n = 9$ , vehicle;  $n = 10$ , withaferin A), (f) *db/db* ( $n = 10$ , vehicle;  $n = 7$ , withaferin A) and (h) *ob/ob* ( $n = 10$ , vehicle;  $n = 7$ , withaferin A) mice after 3-week treatment. Values are averages  $\pm$  s.e.m.  $P$  values are determined by two-way ANOVA (a,c,e,g) or Student's  $t$  test (b,d,f,h). \*  $P < 0.05$ , \*\*  $P < 0.01$ , \*\*\*  $P < 0.001$ .
